# Supplementary material for: Online hyphenation of in-capillary aptamer-functionalized solid-phase microextraction and extraction nanoelectrospray ionization for miniature mass spectrometry analysis
Source: Royal Society of Chemistry journal article supplement (doi:10.1039/d3an00111c), 2023-01-01
Supplement: d3an00111c1.pdf [file d3an00111c1.pdf]

## Supporting Information

### **Online hyphenation of in-capillary aptamer-functionalized solid-phase microextraction and extraction nanoelectrospray ionization for miniature mass spectrometry analysis**

Yueguang Lv<sup>a</sup>, Yuhan Shang<sup>a</sup>, Linsen Li<sup>a,b</sup>, Ying Zhang<sup>a</sup>, Qiang Ma<sup>a,\*</sup>

<sup>a</sup> Key Laboratory of Consumer Product Quality Safety Inspection and Risk Assessment for State Market Regulation, Chinese Academy of Inspection and Quarantine, Beijing 100176, China

<sup>b</sup> Key Laboratory of Molecular Medicine and Biotherapy, School of Life Science, Beijing Institute of Technology, Beijing 100081, China

\* Corresponding Author:

Qiang Ma

Key Laboratory of Consumer Product Quality Safety Inspection and Risk Assessment for State Market Regulation, Chinese Academy of Inspection and Quarantine  
Beijing 100176, China

E-mail: maqiang@caiq.org.cn

Phone: +86 10 53897463

Fax: +86 10 53897454

## Table of Contents

### Supplementary Tables:

|           |                                                                                                                               |
|-----------|-------------------------------------------------------------------------------------------------------------------------------|
| Table S1: | The amount of the caffeine-specific aptamers immobilized on the aluminum foil SPME strip with different gold-sputtering time. |
| Table S2: | Instrumental parameters of the miniature mass spectrometer.                                                                   |
| Table S3: | Results of recovery experiments spiked at low, medium, and high concentration levels ( $n = 6$ ).                             |
| Table S4: | Comparison of the current method with other approaches for the analysis of caffeine.                                          |

### Supplementary Figures:

|             |                                                                                                                                      |
|-------------|--------------------------------------------------------------------------------------------------------------------------------------|
| Figure S1:  | Photo of the custom-modified sample cartridge for miniature MS analysis.                                                             |
| Figure S2:  | Calibration curve for quantitative analysis of the caffeine-specific aptamers ( $n = 6$ ).                                           |
| Figure S3:  | Optimization of microextraction time for the in-capillary aptamer-functionalized SPME process ( $n = 6$ ).                           |
| Figure S4:  | Optimization of desorption solvent for the in-capillary aptamer-functionalized SPME process ( $n = 6$ ).                             |
| Figure S5:  | The CD spectra of the caffeine-specific aptamers in water and methanol.                                                              |
| Figure S6:  | Optimization of desorption time for the in-capillary aptamer-functionalized SPME process ( $n = 6$ ).                                |
| Figure S7:  | Optimization of capillary-to-inlet distance and electric voltage.                                                                    |
| Figure S8:  | (A) Full-scan MS and (B) MS/MS spectra for the analysis of caffeine in a real coffee beverage sample (Americano, brand A).           |
| Figure S9:  | (A) Full-scan MS and (B) MS/MS spectra for the analysis of caffeine in a real coffee beverage sample (Americano, brand B).           |
| Figure S10: | (A) Full-scan MS and (B) MS/MS spectra for the analysis of caffeine in a real coffee beverage sample (Americano, brand C).           |
| Figure S11: | (A) Full-scan MS and (B) MS/MS spectra for the analysis of caffeine in a real coffee beverage sample (Mocha, brand C).               |
| Figure S12: | Quantitative analysis of caffeine in four real coffee beverage samples using the current method and a well-established LC–MS method. |

### References

## Supplementary Tables

Table S1. The amount of the caffeine-specific aptamers immobilized on the aluminum foil SPME strip with different gold-sputtering time.

| Sputtering time (s)                           | 20    | 40    | 60    | 80    | 100   | 120   |
|-----------------------------------------------|-------|-------|-------|-------|-------|-------|
| UV Absorbance at 260 nm                       | 0.704 | 0.379 | 0.390 | 0.394 | 0.450 | 0.456 |
| Immobilization amount (nmol/cm <sup>2</sup> ) | 0.109 | 0.812 | 0.789 | 0.780 | 0.659 | 0.645 |

Table S2. Instrumental parameters of the miniature mass spectrometer.

| Mode      | Polarity | Spray voltage<br>(kV) | DAPI injection size<br>(ms) | CID amplitude<br>(V) | Mass range<br>( <i>m/z</i> ) |
|-----------|----------|-----------------------|-----------------------------|----------------------|------------------------------|
| Full-scan | Positive | 2.8                   | 40                          | /                    | 50–300                       |
| MS/MS     | Positive | 2.8                   | 50                          | 1.2                  | 50–220                       |

Table S3. Results of recovery experiments spiked at low, medium, and high concentration levels ( $n = 6$ ).

| Sample                         | Amount spiked<br>(ng/mL) | Amount detected<br>(ng/mL) | Recovery<br>(%) | RSD<br>(%) |
|--------------------------------|--------------------------|----------------------------|-----------------|------------|
| Electronic cigarette<br>liquid | 20                       | 22.3                       | 111.5           | 3.1        |
|                                | 50                       | 46.2                       | 92.4            | 4.6        |
|                                | 100                      | 89.3                       | 89.3            | 5.2        |
| Beverage                       | 20                       | 21.7                       | 108.5           | 3.8        |
|                                | 50                       | 44.6                       | 89.2            | 5.3        |
|                                | 100                      | 87.5                       | 87.5            | 6.1        |

Table S4. Comparison of the current method with other approaches for the analysis of caffeine.

| Matrix                                   | Sample preparation            | Analytical Technique   | Analysis time<br>(min) | LOD<br>( $\mu\text{g/mL}$ ) | LOQ<br>( $\mu\text{g/mL}$ ) | Linear range<br>( $\mu\text{g/mL}$ ) | RSD<br>(%) | Reference |
|------------------------------------------|-------------------------------|------------------------|------------------------|-----------------------------|-----------------------------|--------------------------------------|------------|-----------|
| Tea, coffee, and beverage                | DLLME                         | GC–NPD                 | ~31                    | 0.02                        | 0.05                        | 0.05–500                             | 3.2        | [1]       |
| Tea                                      | MIP-SPE                       | ESI-IMS                | 154                    | 0.20                        | 0.50                        | 0.5–20                               | < 6.0      | [2]       |
| Coffee                                   | DES-LPME                      | HPLC-UV                | 8                      | 0.12                        | 0.40                        | 0.5–100                              | 2.2        | [3]       |
| Beverage                                 | DLLME                         | UV–Vis                 | 960                    | 0.46                        | 1.54                        | 2–75                                 | 2.1        | [4]       |
| Beverage                                 | DDSME                         | GC–MS                  | 12                     | 0.004                       | 0.05                        | 0.05–5                               | 4.4        | [5]       |
| Beverage and pharmaceutical formulations | Sonication and centrifugation | Electrochemical Sensor | 20                     | 0.56                        | 0.97                        | 0.97–19.42                           | 5.9        | [6]       |
| Human plasma                             | Centrifugation                | LC-MS/MS               | 13                     | 0.0001                      | 0.00033                     | 0.00067–0.333                        | < 5.0      | [7]       |
| Electronic cigarette liquid and beverage | SPME                          | Extraction nanoESI-MS  | < 5                    | 0.0015<br>0.003             | 0.05<br>0.01                | 0.01–1                               | < 6.1      | This work |

\*DLLME: dispersive liquid–liquid microextraction; MIP-SPE: molecular imprinted polymer-solid phase extraction; DES-LPME: deep eutectic solvent-based liquid-phase microextraction; DDSME: Drop-to-drop solvent microextraction; SPME: solid-phase microextraction, GC–NPD: gas chromatography–nitrogen phosphorus detection; ESI-IMS: electrospray ionization-ion mobility spectrometry; HPLC-UV: high-performance liquid chromatography-ultraviolet spectroscopy; UV–Vis: ultraviolet-visible spectroscopy; GC–MS: gas chromatography–mass spectrometry; LC-MS/MS: liquid chromatography-tandem mass spectrometry; nanoESI-MS: nanoelectrospray ionization-mass spectrometry.

## Supplementary Figures

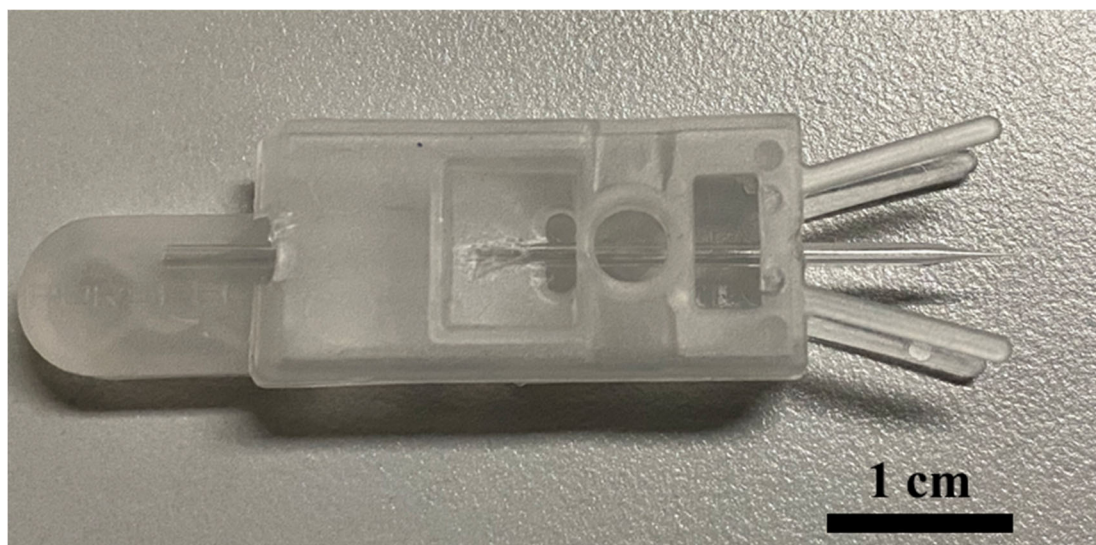

Figure S1. Photo of the custom-modified sample cartridge for miniature MS analysis.

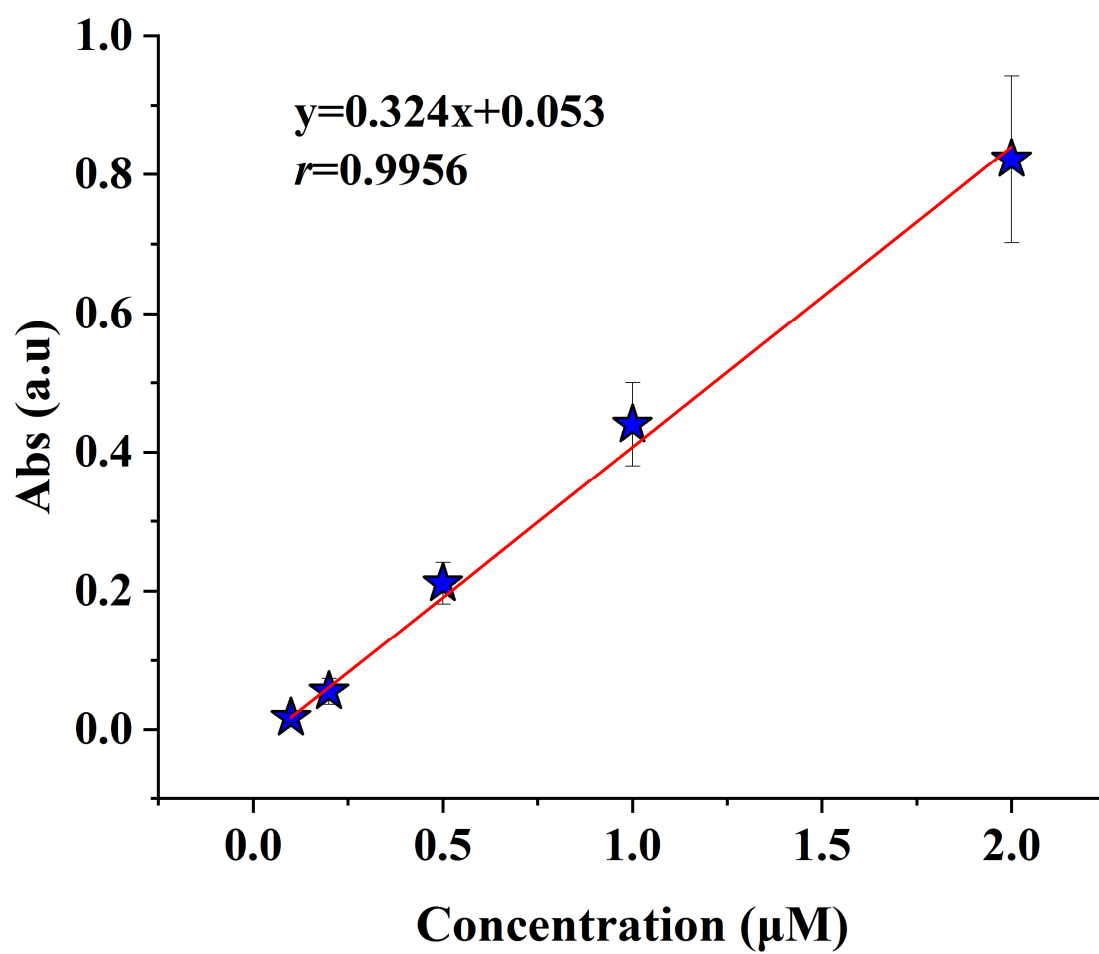

Figure S2. Calibration curve for quantitative analysis of the caffeine-specific aptamers ( $n = 6$ ).



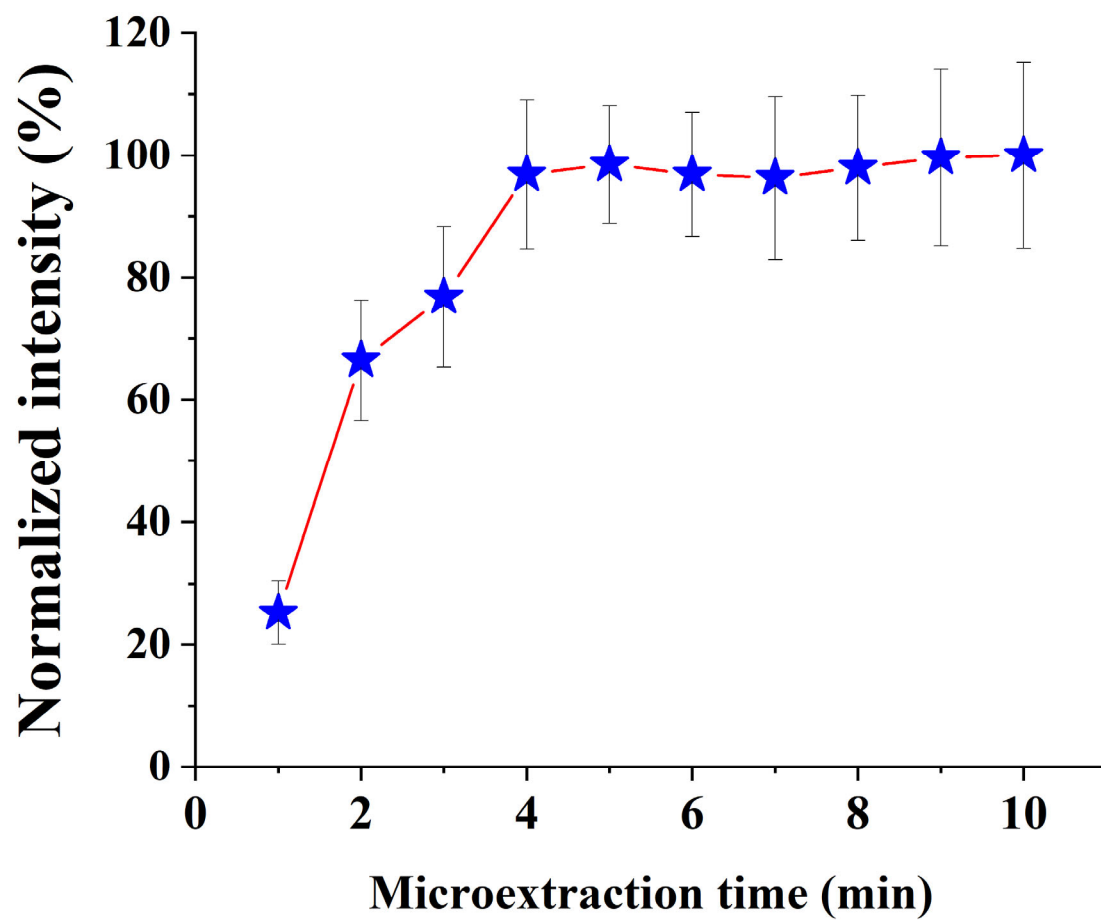

Figure S3. Optimization of microextraction time for the in-capillary aptamer-functionalized SPME process ( $n = 6$ ).

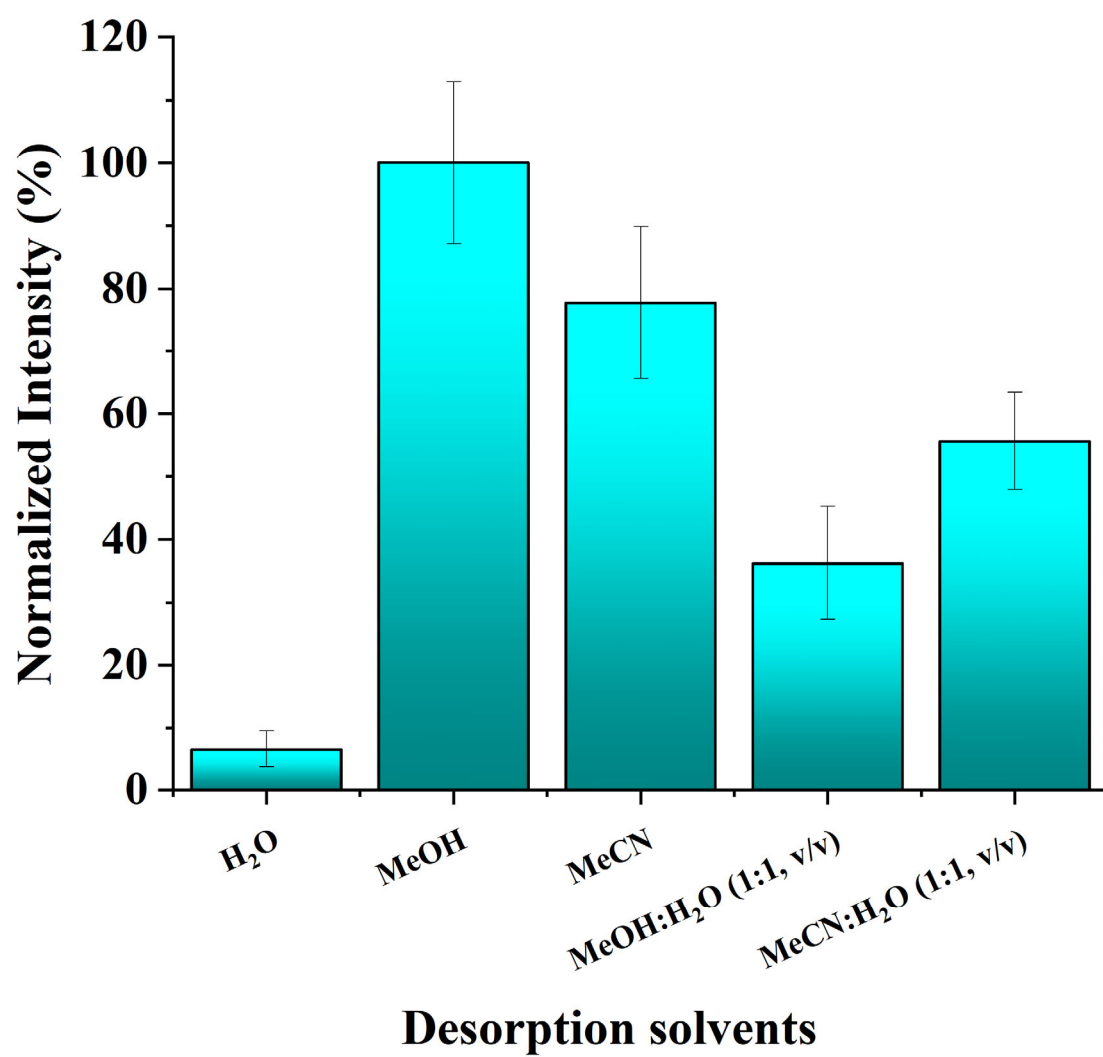

Figure S4. Optimization of desorption solvent for the in-capillary aptamer-functionalized SPME process ( $n = 6$ ).

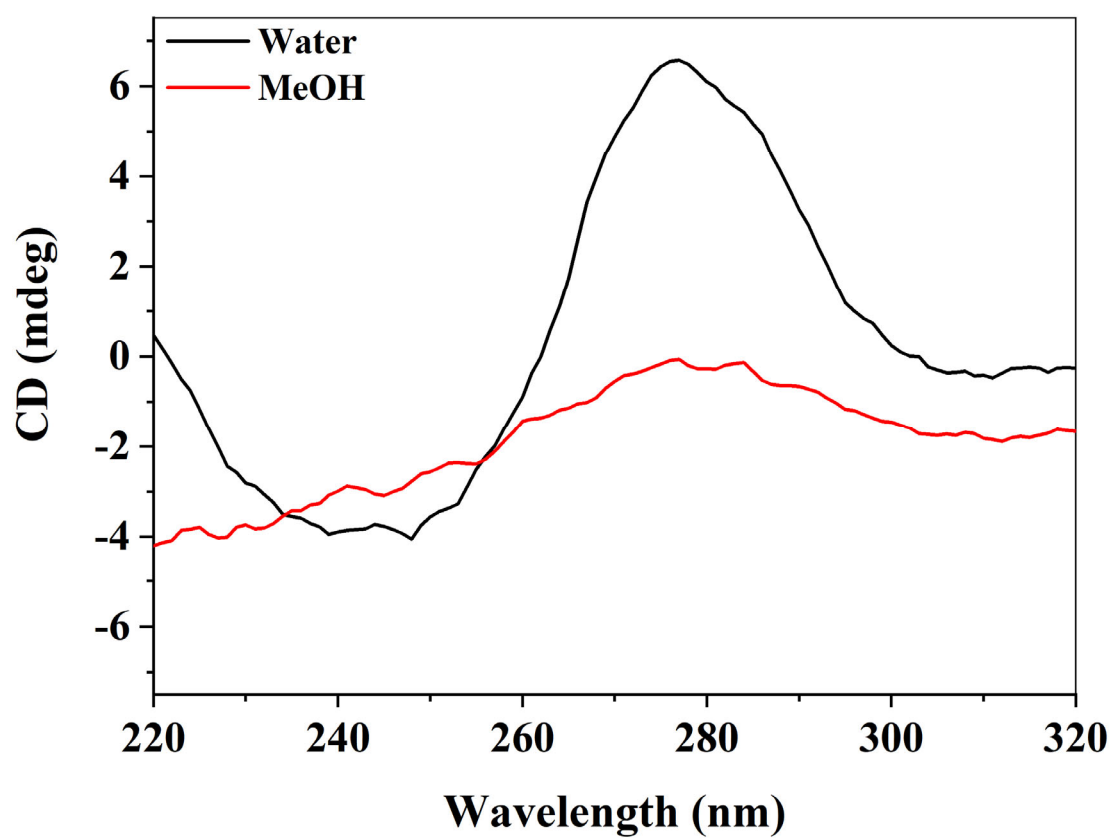

Figure S5. The CD spectra of the caffeine-specific aptamers in water and methanol.

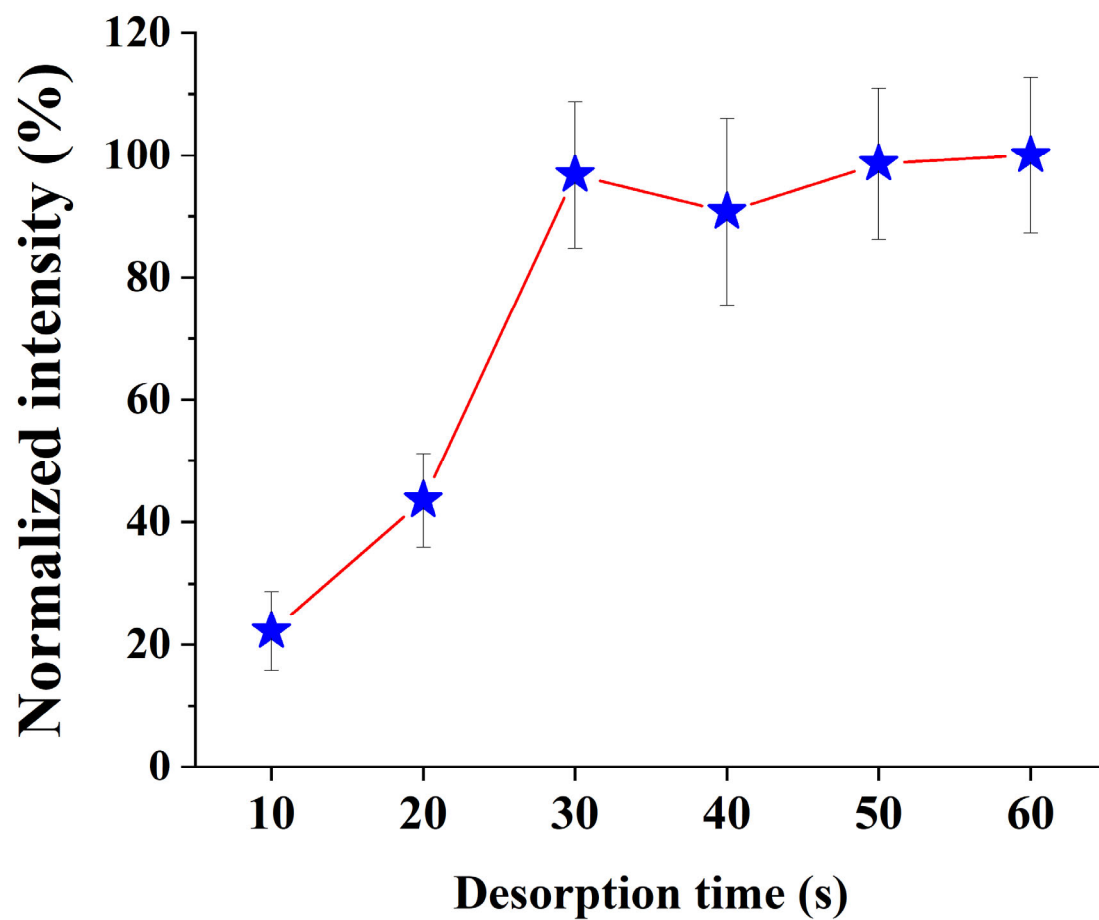

Figure S6. Optimization of desorption time for the in-capillary aptamer-functionalized SPME process ( $n = 6$ ).

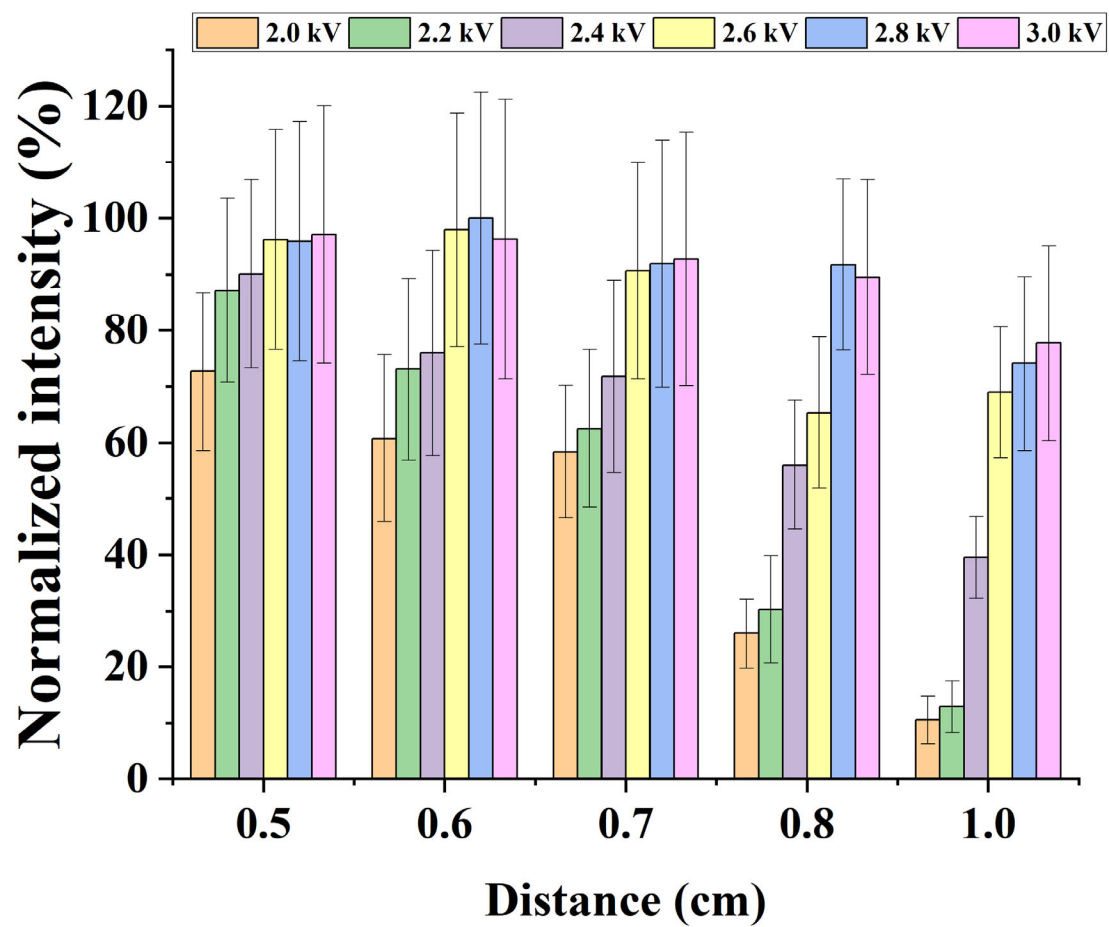

Figure S7. Optimization of capillary-to-inlet distance and electric voltage.

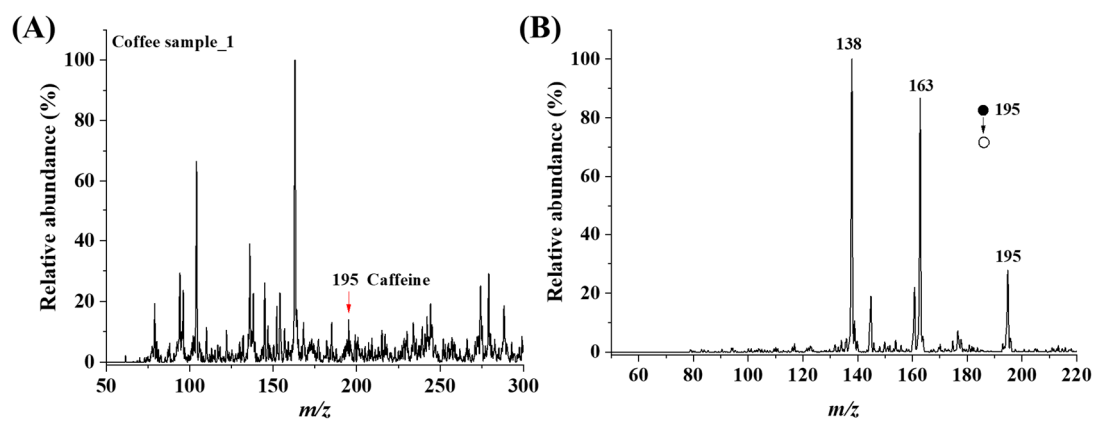

Figure S8. (A) Full-scan MS and (B) MS/MS spectra for the analysis of caffeine in a real coffee beverage sample (Americano, brand A).

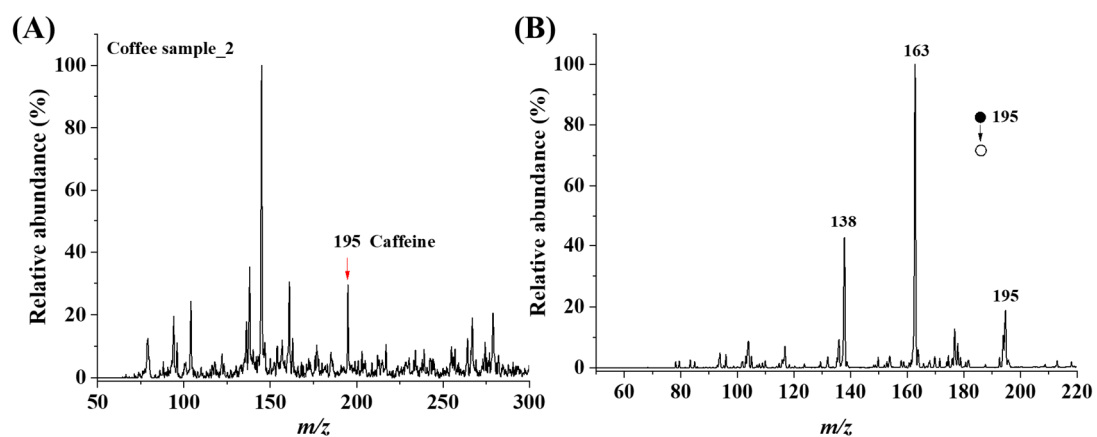

Figure S9. (A) Full-scan MS and (B) MS/MS spectra for the analysis of caffeine in a real coffee beverage sample (Americano, brand B).

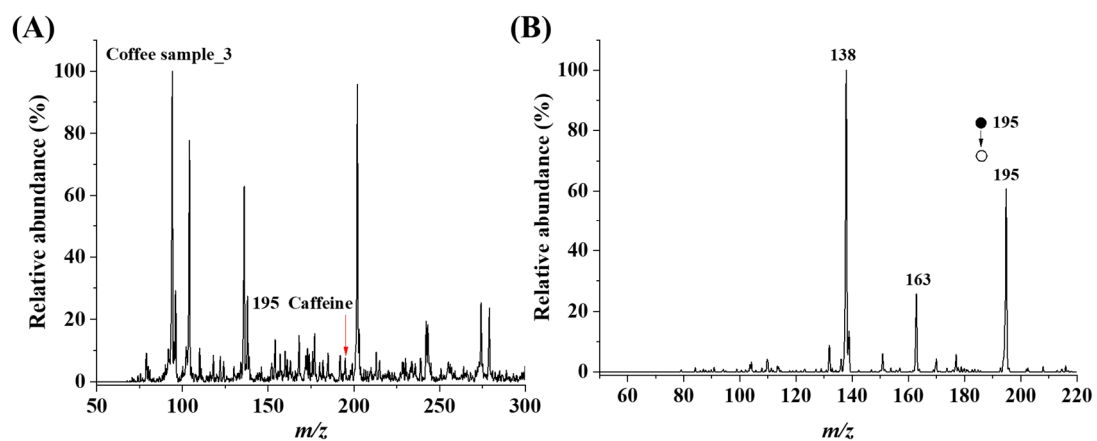

Figure S10. (A) Full-scan MS and (B) MS/MS spectra for the analysis of caffeine in a real coffee beverage sample (Americano, brand C).



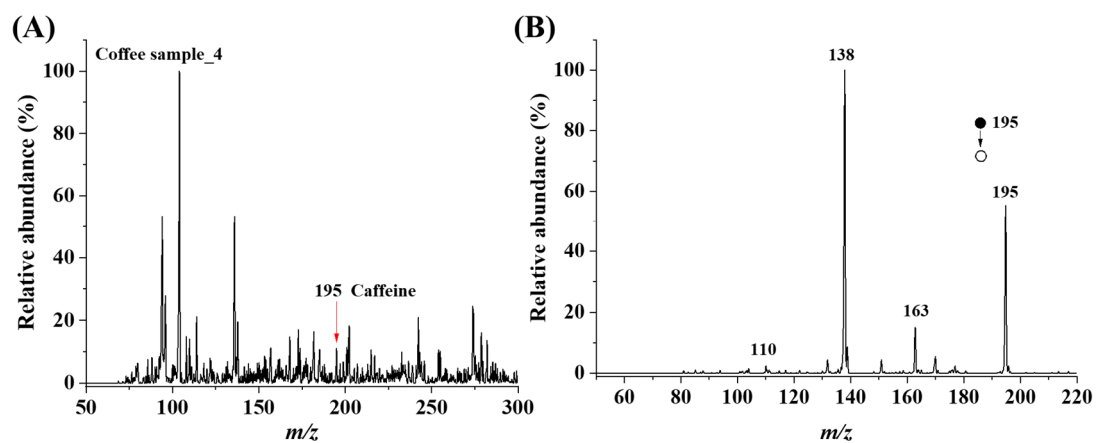

Figure S11. (A) Full-scan MS and (B) MS/MS spectra for the analysis of caffeine in a real coffee beverage sample (Mocha, brand C).

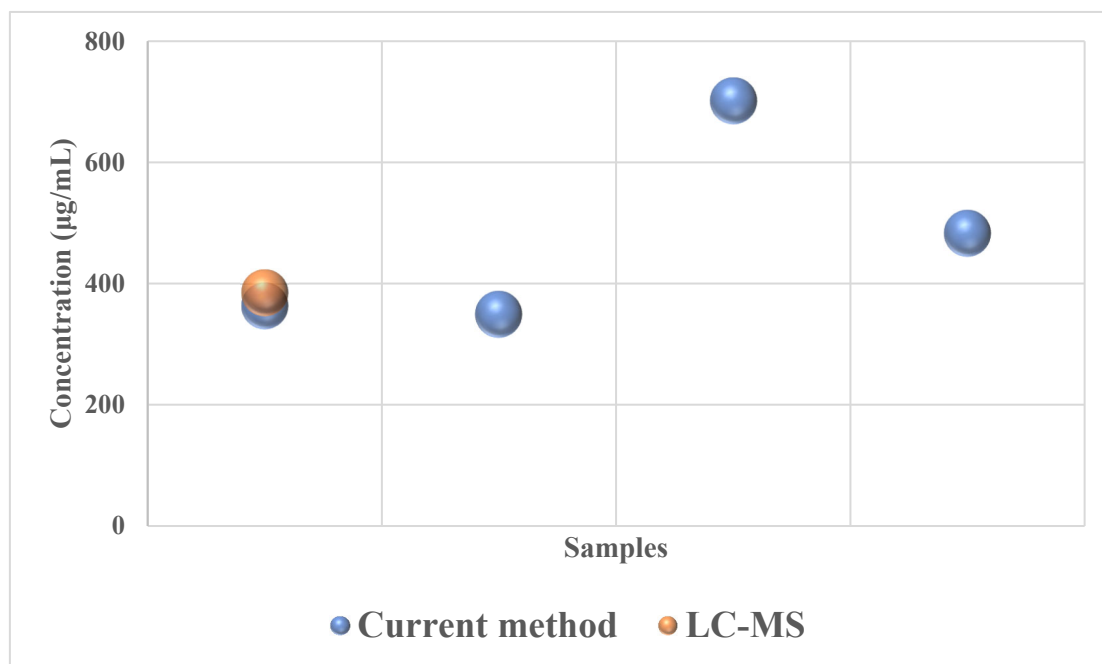

Figure S12. Quantitative analysis of caffeine in four real coffee beverage samples using the current method and a well-established LC–MS method.

## References

- [1] H. Sereshti, S. Samadi, Food Chem., 2014, 158, 8-13.
- [2] M.T. Jafari, B. Rezaei, M. Javaheri, Food Chem., 2011, 126, 1964-1970.
- [3] S. Sivrikaya, Food Addit. Contam., 2020, 37, 488-495.
- [4] R.M. Frizzarin, F. Maya, J.M. Estela, V. Cerda, Food Chem., 2016, 212, 759-767.
- [5] K. Shrivastava, H.-F. Wu, J. Chromatogr. A, 2007, 1170, 9-14.
- [6] M.K.S. Monteiro, D.R.D. Silva, M.A. Quiroz, V.J.P. Vilar, E.V.D. Santos, Materials, 2020, 14, 37.
- [7] Y.H. Wang, G. Mondal, M. Butawan, R.J. Bloomer, C.R. Yates, J. Chromatogr. B, 2020, 1155, 122278.
